# Supplementary figures and images for: Computational Approaches and Use of Chiroptical Probes in the Absolute Configuration Assignment to Natural Products by ECD Spectroscopy: A 1,2,3-Trihydroxy-p-menthane as a Case Study
Source: MDPI journal article supplement (doi:10.3390/biom12030421), 2022-03-09

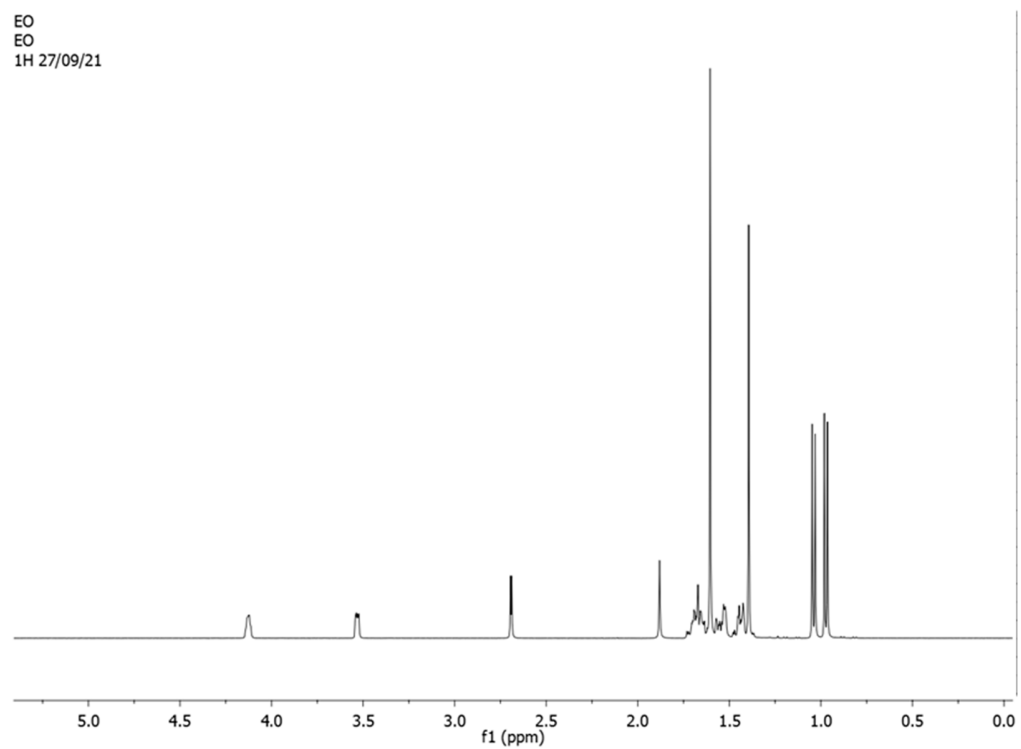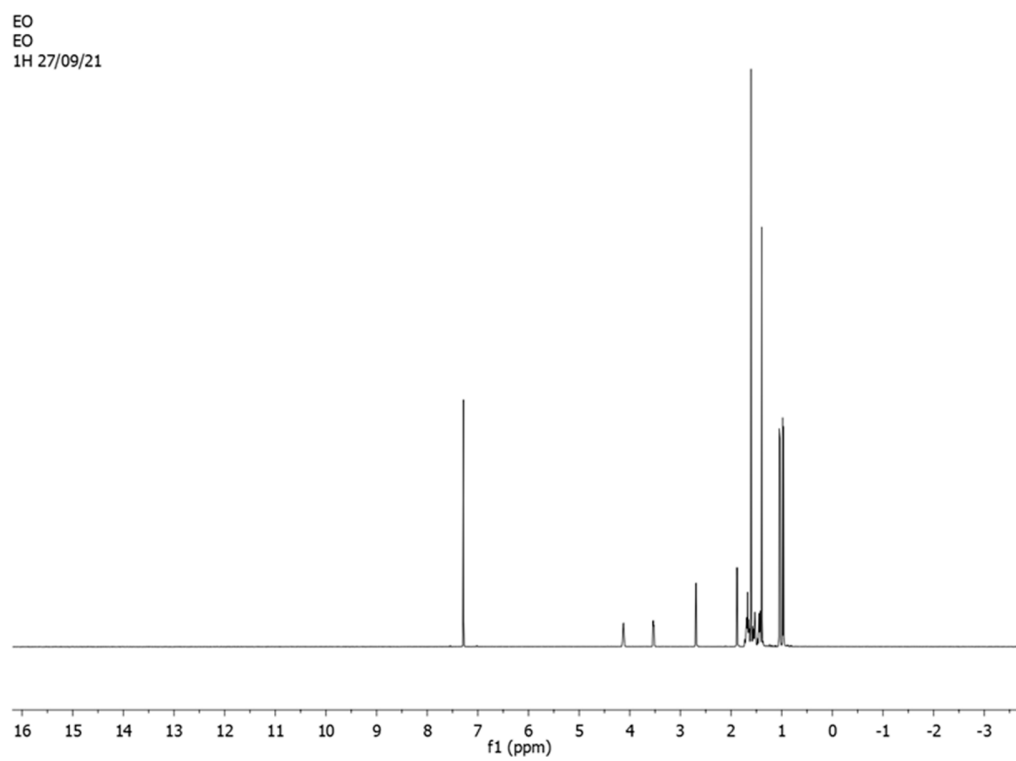

Figure S1. NMR Spectrum of (-)-**1**. Top view expanded spectrum, bottom view full spectrum.

Supplement: s1 [file s1]
